# Supplementary material for: Anti-müllerian Hormone for the Prediction of Ovarian Response in Progestin-Primed Ovarian Stimulation Protocol for IVF
Source: PubMed Central journal article supplement (PMC6547790; doi:10.3389/fendo.2019.00325), 2019-05-28
Supplement: Image_1.pdf [file Image_1.pdf]

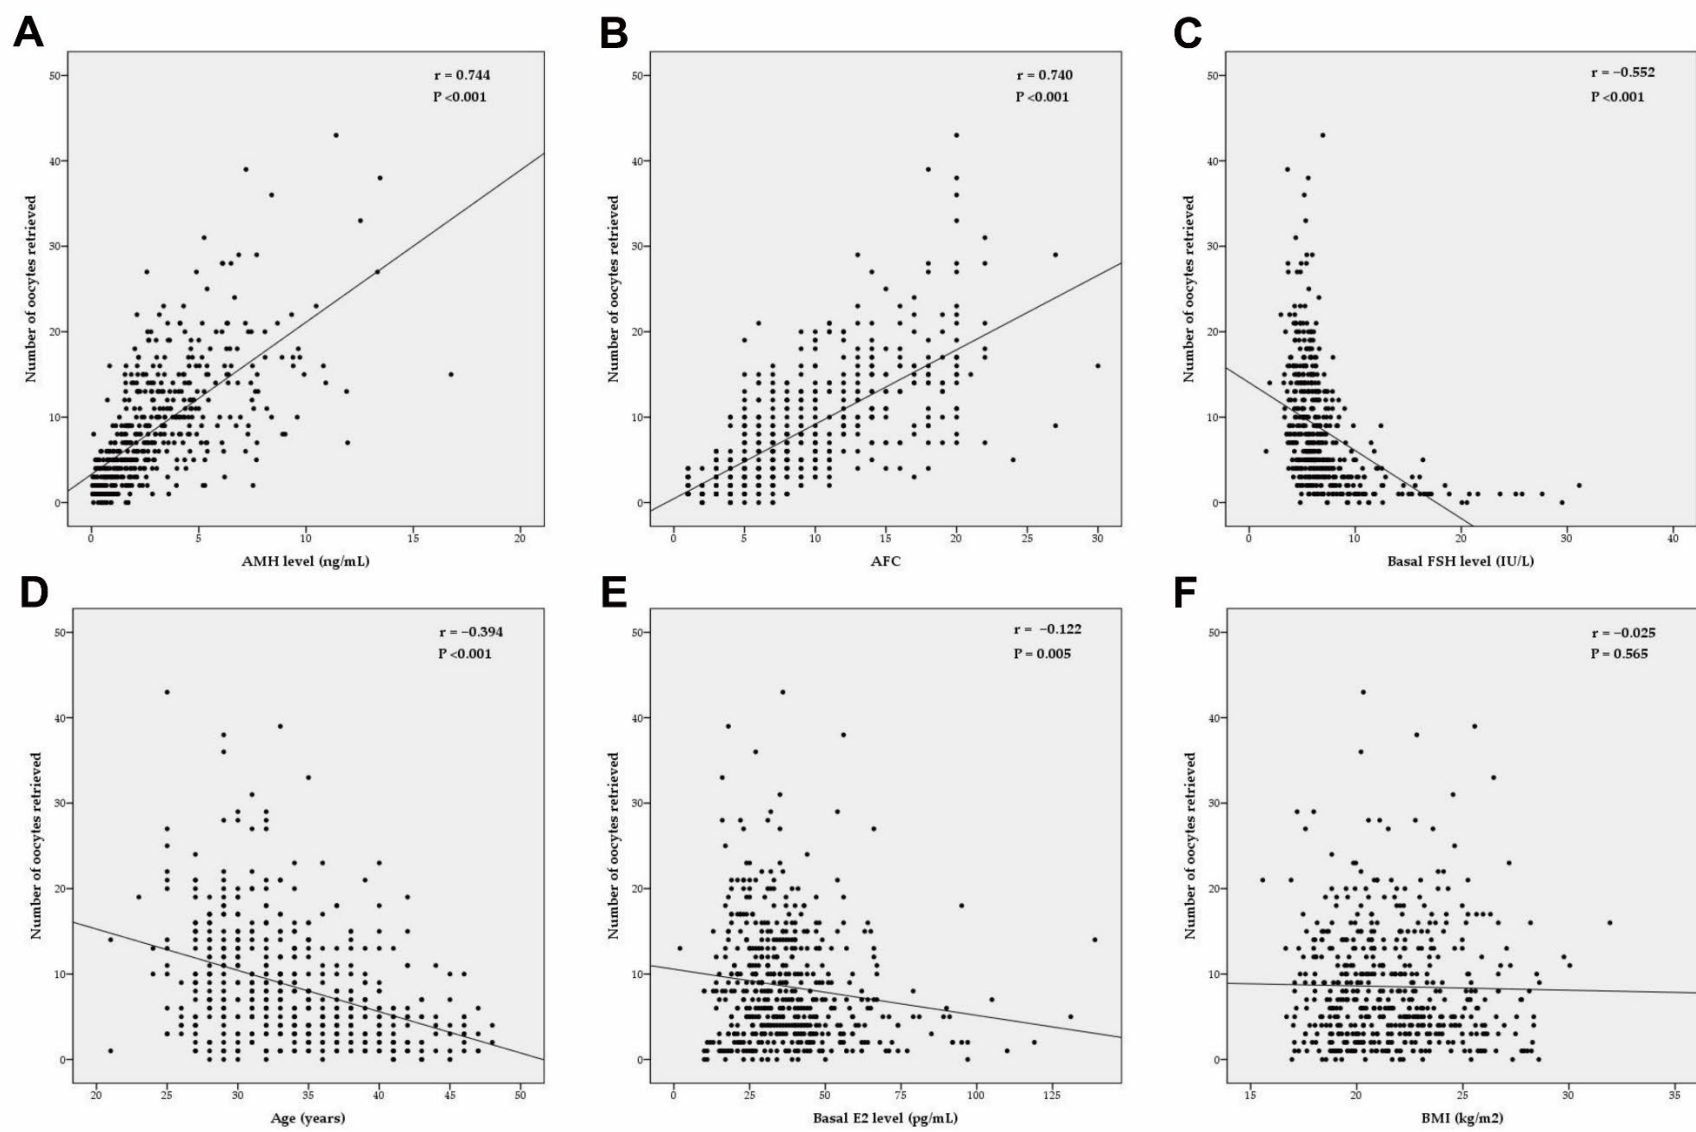

**Supplementary figure 1.** Correlation analysis between patients' baseline characteristics and the number of oocytes retrieved. (A) AMH level, (B) AFC, (C) basal FSH level, (D) age, (E) basal E<sub>2</sub> level, and (F) BMI. The Spearman's rank correlation coefficients ( $r$ ) and  $P$  value are shown in the top right. The linear line is the line of best fit.
